# Supplementary material
Source: PubMed Central journal article supplement (PMC8410666)

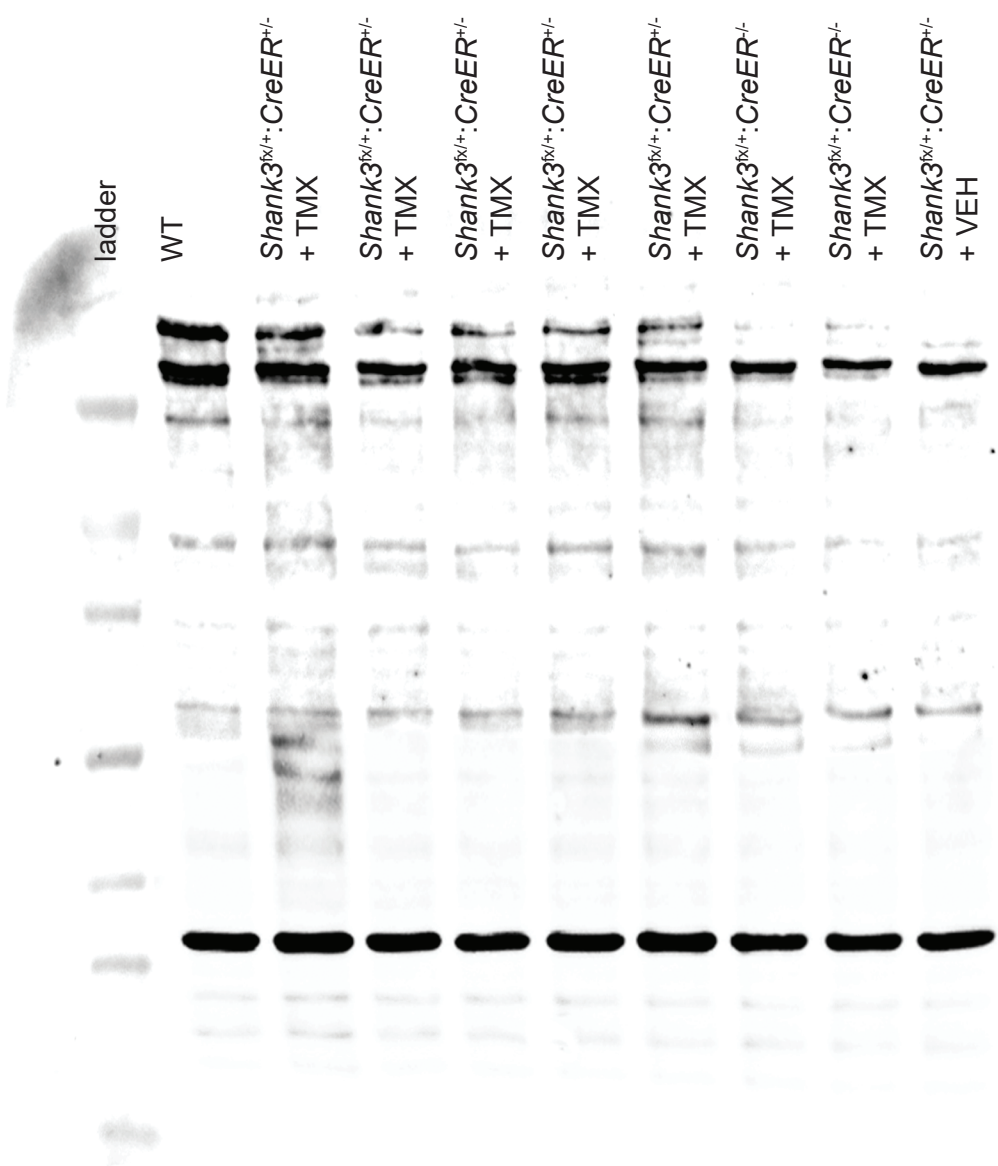

Supplement: NIHMS1712623-supplement-Source_Data_for_Fig_4B_-_Unmodified_gel.pdf [file NIHMS1712623-supplement-Source_Data_for_Fig_4B_-_Unmodified_gel.pdf]
